# Supplementary material
Source: Springer Nature journal article supplement (https://www.springermedizin.de/resource/supplementary/13054_2013_1766_MOESM7_ESM.pdf/9711630)

**IFN- $\gamma$ <sup>+</sup> CD4 T cells**  
(Two hit: CLP + Candida)

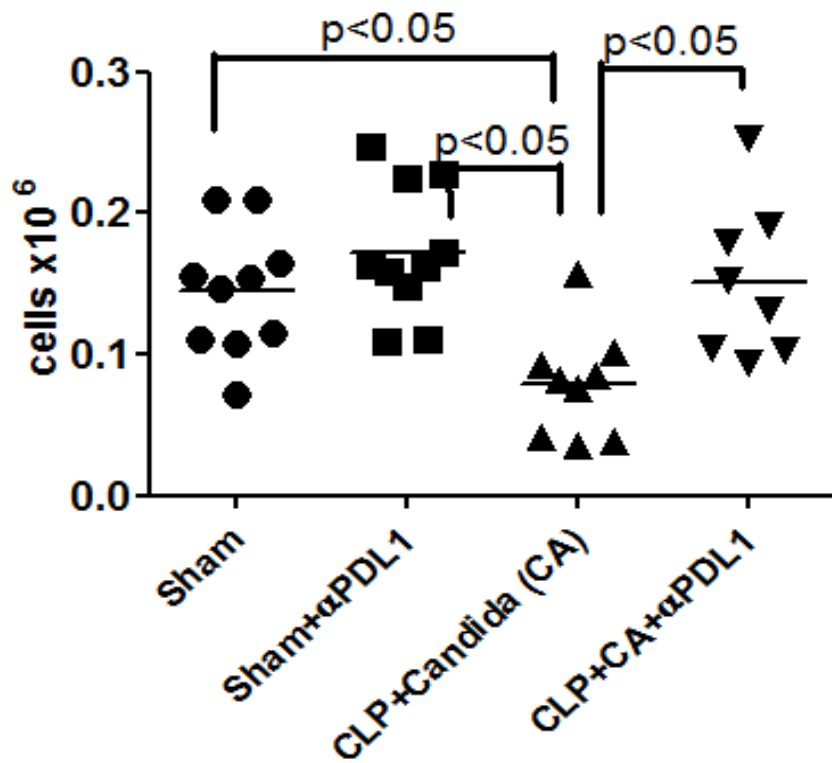

**IFN- $\gamma$ <sup>+</sup> CD8 T cells**  
(Two hit: CLP + Candida)

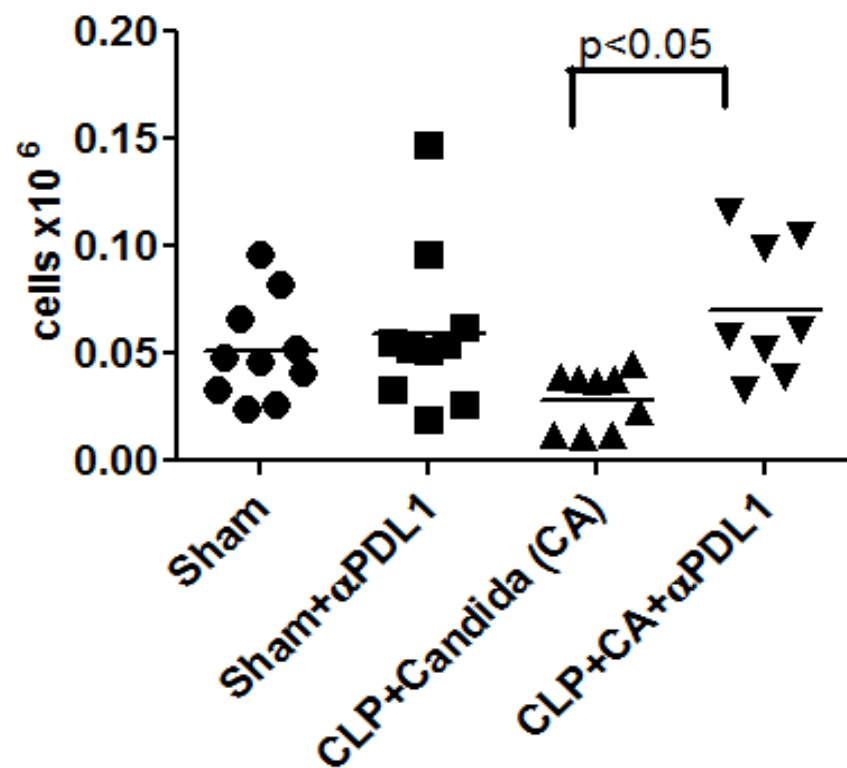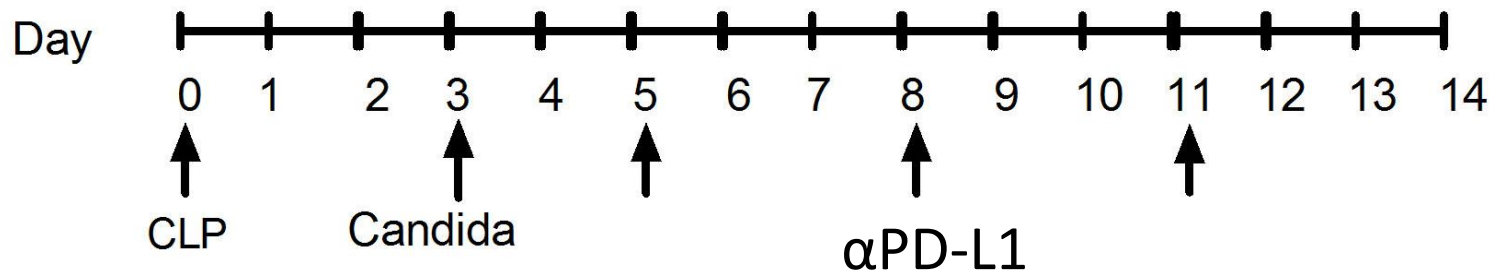

Supplement: MOESM7 [file 9711630]
